# Supplementary material for: Distribution of tyrosol fatty acid esters in the gastrointestinal tracts of mice and their hydrolysis characteristics by gut microbiota
Source: Royal Society of Chemistry journal article supplement (doi:10.1039/d1fo04029d), 2022-01-01
Supplement: d1fo04029d1.pdf [file d1fo04029d1.pdf]

**Table 1S.** TYr and TYr-Es (T-C14:0, T-C16:0 and T-C18:0) determination of gastrointestinal tract contents with known concentrations of added

TYr or TYr-E by the HPLC-UV method.

| Object      | Equations                                                              | LOD<br>( $\mu\text{M}$ ) | LOQ<br>( $\mu\text{M}$ ) | $C_{(\text{TYr or TYr-E})}$<br>added<br>( $\mu\text{M}$ ) | $C_{(\text{TYr or TYr-E})}$<br>founded<br>( $\mu\text{M}$ ) | Accuracy<br>(%) | Intraday<br>coefficient<br>variations (%) | Interday<br>coefficient<br>variations (%) |
|-------------|------------------------------------------------------------------------|--------------------------|--------------------------|-----------------------------------------------------------|-------------------------------------------------------------|-----------------|-------------------------------------------|-------------------------------------------|
| TYr         | $y=1076.07x+23855.22$<br>( $R^2=0.9999$ , 16.0-1000.0 $\mu\text{M}$ )  | 9.0                      | 12.0                     | 50                                                        | 52.0                                                        | 104.0           | 9.4                                       | 8.7                                       |
|             |                                                                        |                          |                          | 200                                                       | 193.5                                                       | 96.8            | 4.4                                       | 7.6                                       |
|             |                                                                        |                          |                          | 800                                                       | 779.3                                                       | 97.4            | 6.8                                       | 6.9                                       |
| T-<br>C14:0 | $y=1281.88x+32886.23$<br>( $R^2=0.9998$ , 312.5-4000.0 $\mu\text{M}$ ) | 175.0                    | 265.0                    | 400                                                       | 394.9                                                       | 98.72           | 9.2                                       | 10.9                                      |
|             |                                                                        |                          |                          | 1200                                                      | 1193.7                                                      | 99.48           | 6.5                                       | 4.3                                       |
|             |                                                                        |                          |                          | 3600                                                      | 3486.6                                                      | 96.85           | 8.8                                       | 4.7                                       |
| T-<br>C16:0 | $y=1306.12x+32597.43$<br>( $R^2=0.9999$ , 312.5-4000.0 $\mu\text{M}$ ) | 160.0                    | 250.0                    | 400                                                       | 395.9                                                       | 98.98           | 9.3                                       | 9.0                                       |
|             |                                                                        |                          |                          | 1200                                                      | 1203.7                                                      | 100.31          | 8.6                                       | 8.4                                       |
|             |                                                                        |                          |                          | 3600                                                      | 3593.8                                                      | 99.83           | 7.1                                       | 8.0                                       |
| T-<br>C18:0 | $y=1214.20x+33266.57$<br>( $R^2=0.9998$ , 312.5-4000.0 $\mu\text{M}$ ) | 160.0                    | 250.0                    | 400                                                       | 397.6                                                       | 99.4            | 8.7                                       | 9.0                                       |
|             |                                                                        |                          |                          | 1200                                                      | 1206.5                                                      | 100.5           | 8.7                                       | 7.6                                       |
|             |                                                                        |                          |                          | 3600                                                      | 3598.6                                                      | 100.0           | 6.4                                       | 7.9                                       |
