# Supplementary material for: Distribution of tyrosol fatty acid esters in the gastrointestinal tracts of mice and their hydrolysis characteristics by gut microbiota
Source: Royal Society of Chemistry journal article supplement (doi:10.1039/d1fo04029d), 2022-01-01
Supplement: d1fo04029d2.pdf [file d1fo04029d2.pdf]

**Table 2S.** TYr determination of fermentation samples with known concentrations of added TYr the HPLC-UV method.

| Object | Equations                                                             | LOD<br>( $\mu\text{M}$ ) | LOQ<br>( $\mu\text{M}$ ) | $C_{(\text{TYr})}$<br>added<br>( $\mu\text{M}$ ) | $C_{(\text{TYr})}$<br>founded<br>( $\mu\text{M}$ ) | Accuracy<br>(%) | Intraday<br>coefficient<br>variations<br>(%) | Interday<br>coefficient<br>variations (%) |
|--------|-----------------------------------------------------------------------|--------------------------|--------------------------|--------------------------------------------------|----------------------------------------------------|-----------------|----------------------------------------------|-------------------------------------------|
| TYr    | y=2000000.00x+7091.40<br>(0.9921, 5.0-335.0 $\mu\text{M}$ )           | 0.75                     | 3.0                      | 10                                               | 9.9                                                | 99.00           | 9.7                                          | 10.2                                      |
|        |                                                                       |                          |                          | 50                                               | 48.7                                               | 97.40           | 7.5                                          | 8.9                                       |
|        |                                                                       |                          |                          | 250                                              | 255.8                                              | 102.32          | 7.9                                          | 8.8                                       |
|        | y=2000000.00x+109116.00<br>( $R^2=0.9955$ , 5.0-335.0 $\mu\text{M}$ ) | 0.5                      | 2.0                      | 10                                               | 10.3                                               | 103.00          | 10.3                                         | 10.2                                      |
|        |                                                                       |                          |                          | 50                                               | 48.8                                               | 97.60           | 8.5                                          | 6.8                                       |
|        |                                                                       |                          |                          | 250                                              | 243.9                                              | 97.56           | 8.7                                          | 8.4                                       |
